# Supplementary material for: MT1-MMP dependent repression of the tumor suppressor SPRY4 contributes to MT1-MMP driven melanoma cell motility
Source: PubMed Central journal article supplement (PMC4741782; doi:10.18632/oncotarget.5258), 2015-09-12
Supplement: oncotarget-06-33512-s001.pdf [file oncotarget-06-33512-s001.pdf]

## SUPPLEMENTARY FIGURES

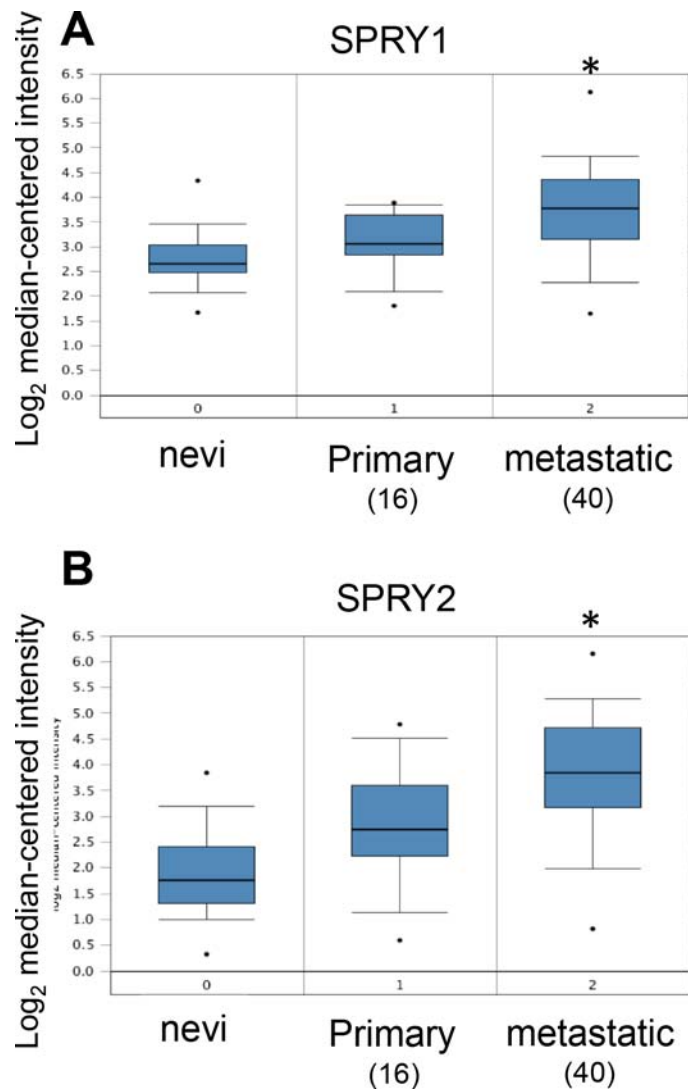

**Supplementary Figure S1: SPRY1 and SPRY2 are increased in metastatic melanoma: Riker data set.** Expression levels of both SPRY1 and 2 are increased in metastatic melanoma samples versus primary lesions. \* $p < 0.05$ .

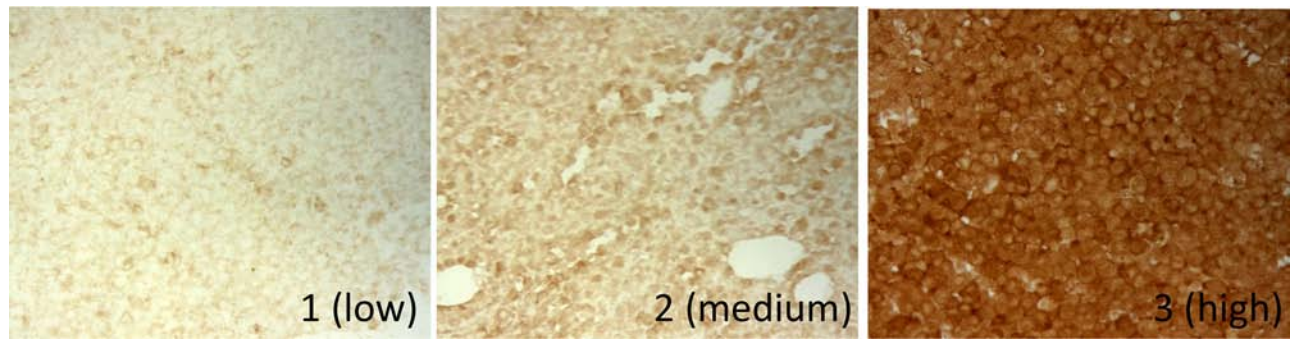

Supplementary Figure S2: staining intensity of the tissue array.
